# Supplementary material
Source: PubMed Central journal article supplement (PMC10991226)
Supplement: 262_2021_3021_MOESM1_ESM.pdf [file 262_2021_3021_MOESM1_ESM.pdf]

1 **Supplementary Table 1.** Multivariate analysis results of clinicopathological characteristics and preoperative soluble PD-L1.

| Variables                                                                        | RFS                |                  | OS                 |                  |
|----------------------------------------------------------------------------------|--------------------|------------------|--------------------|------------------|
|                                                                                  | HR (95% CI)        | P value          | HR (95% CI)        | P value          |
| Age (> 65 vs. ≤ 65)                                                              |                    |                  |                    |                  |
| Gender (Female vs. male)                                                         |                    |                  |                    |                  |
| Primary tumor site (Right-sided vs. Left-sided)                                  |                    |                  |                    |                  |
| Tumor grade (G3 vs. G1–2)                                                        | 1.949(1.23-3.087)  | <b>0.004</b>     |                    |                  |
| Pathological type (Mucinous vs. Non-mucinous)                                    |                    |                  |                    |                  |
| T-stage (T4 vs. Tis-3)                                                           |                    |                  | 1.682(1.002-2.824) | <b>0.049</b>     |
| N-stage (N1–2 vs. N0)                                                            | 1.575(1.000-2.478) | <b>0.050</b>     |                    |                  |
| Preoperative CEA (> 200 vs. ≤ 200 ng/ml)                                         |                    |                  |                    |                  |
| Interval from primary tumor resection to liver metastases (> 12 vs. ≤ 12 months) |                    |                  |                    |                  |
| Number of metastases (> 1 vs. ≤ 1)                                               |                    |                  |                    |                  |
| Size of the largest metastasis (> 5cm vs. ≤ 5cm)                                 | 2.396(1.355-4.237) | <b>0.003</b>     | 3.849(1.852-7.997) | <b>&lt;0.001</b> |
| Preoperative chemotherapy (Yes vs. no)                                           | 2.472(1.609-3.798) | <b>&lt;0.001</b> |                    |                  |
| Postoperative chemotherapy (Yes vs. no)                                          |                    |                  |                    |                  |
| Ablation (Yes vs. no)                                                            |                    |                  |                    |                  |
| Soluble PD-L1 (High vs. low)                                                     | 1.555(1.033-2.341) | <b>0.034</b>     | 2.219(1.197-4.112) | <b>0.011</b>     |

2  
3  
4

5 **Supplementary Table 2.** Basic clinicopathological characteristics of patients in cohort  
6 2.

| Variables                                                 | NO. of patients | Percent |
|-----------------------------------------------------------|-----------------|---------|
| Age                                                       |                 |         |
| >=65                                                      | 6               | 12.24%  |
| <65                                                       | 43              | 87.76%  |
| Gender                                                    |                 |         |
| Male                                                      | 38              | 77.55%  |
| Female                                                    | 11              | 22.45%  |
| Pathological grade                                        |                 |         |
| G1-2                                                      | 45              | 91.84%  |
| G3                                                        | 4               | 8.16%   |
| Histological subtype                                      |                 |         |
| Non-mucinous                                              | 42              | 85.71%  |
| Mucinous                                                  | 0               | 0.00%   |
| Missing                                                   | 7               | 14.29%  |
| Primary tumor T stage                                     |                 |         |
| Tis-3                                                     | 43              | 87.76%  |
| T4                                                        | 5               | 10.20%  |
| Missing                                                   | 1               | 2.04%   |
| Primary tumor N stage                                     |                 |         |
| N0                                                        | 16              | 32.65%  |
| N1-2                                                      | 33              | 67.35%  |
| Primary tumor site                                        |                 |         |
| Right-sided                                               | 12              | 24.49%  |
| Left-sided                                                | 37              | 75.51%  |
| Primary Tumor size                                        |                 |         |
| ≤ 5 cm                                                    | 23              | 46.94%  |
| > 5 cm                                                    | 5               | 10.20%  |
| Missing                                                   | 21              | 42.86%  |
| Preoperative CEA                                          |                 |         |
| ≤ 200 ng/ml                                               | 48              | 97.96 % |
| > 200 ng/ml                                               | 1               | 2.04%   |
| Interval from primary tumor resection to liver metastases |                 |         |
| ≤ 12 months                                               | 41              | 83.67%  |
| > 12 months                                               | 8               | 16.33%  |
| Number of metastases per patient                          |                 |         |
| ≤ 1                                                       | 16              | 32.65%  |
| > 1                                                       | 33              | 67.35%  |
| Size of the largest metastases                            |                 |         |
| ≤ 5 cm                                                    | 39              | 79.59%  |
| > 5 cm                                                    | 10              | 20.41%  |

|                                                         |    |        |
|---------------------------------------------------------|----|--------|
| Resection type of liver metastasis<br>and primary tumor |    |        |
| Simultaneous resection                                  | 22 | 44.9%  |
| Staged resection                                        | 27 | 55.1%  |
| Preoperative chemotherapy                               |    |        |
| No                                                      | 9  | 18.37% |
| Yes                                                     | 40 | 81.63% |
| Chemotherapy                                            | 23 | 46.94% |
| Cetuximab-based                                         | 11 | 22.45% |
| Bevacizumab-based                                       | 6  | 12.24% |
| Postoperative chemotherapy                              |    |        |
| No                                                      | 4  | 8.16%  |
| Yes                                                     | 45 | 91.84% |
| Chemotherapy                                            | 34 | 69.39% |
| Cetuximab-based                                         | 9  | 18.37% |
| Bevacizumab-based                                       | 2  | 4.08%  |
| CRS                                                     |    |        |
| 0–2                                                     | 45 | 91.84% |
| 3–5                                                     | 4  | 8.16%  |

---

7

8

9 **Supplementary Figures**

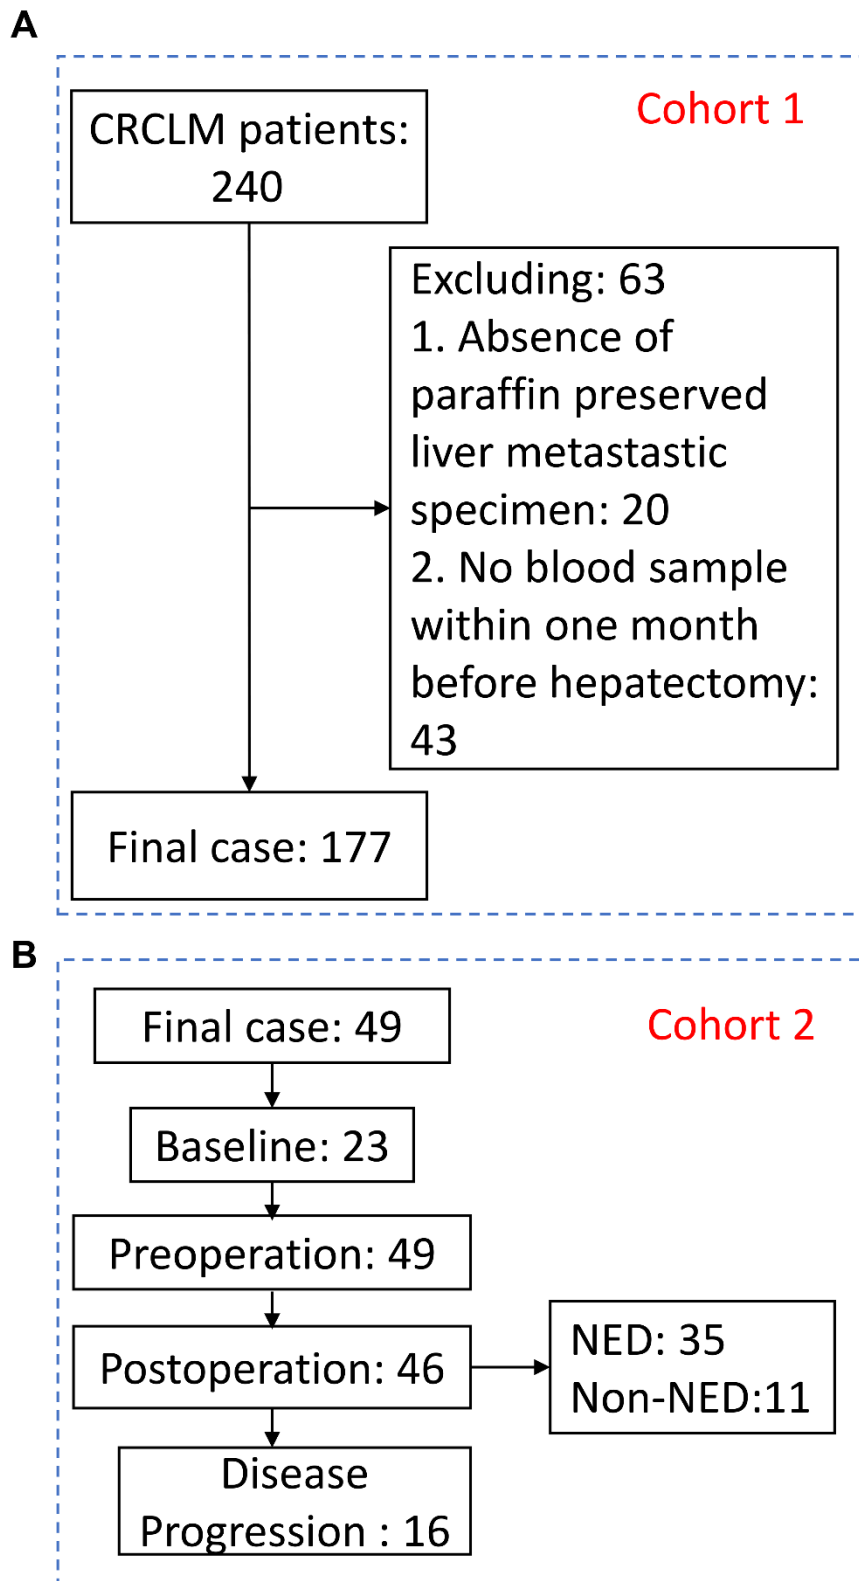

10

11 **Supplementary Figure 1.** Flow chart of the enrollment process in cohort

12 1 (A) and cohort 2 (B).

13

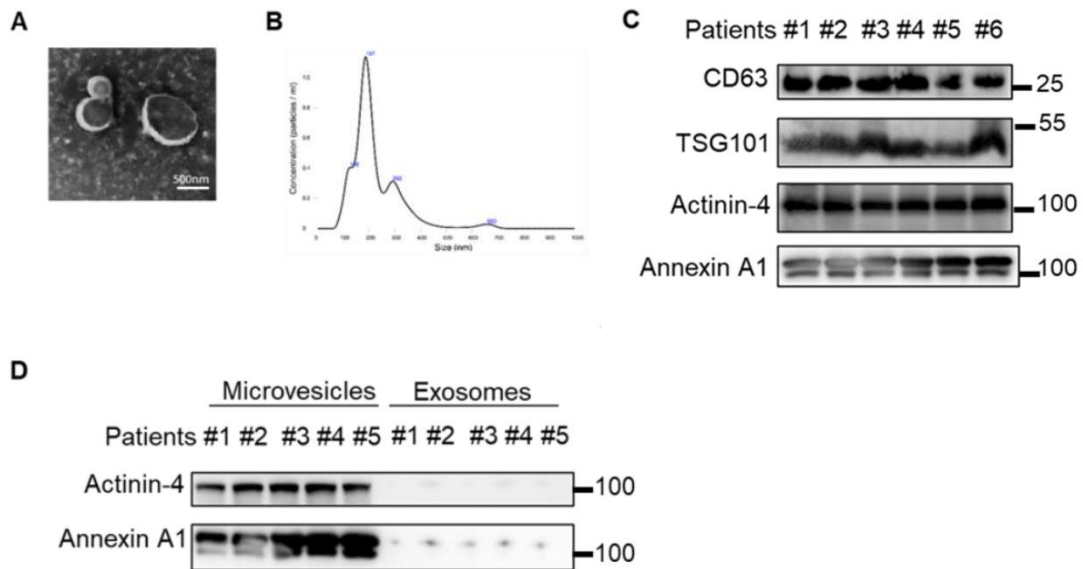

14

15 **Supplementary Figure 2.** Characterization of isolated microvesicles. (A)

16 A representative TEM image of purified microvesicles from patients'

17 plasma. Scale bar, 500 nm.; (B) Characterization of isolated microvesicles

18 using nanoparticle tracking; (C) Representative immunoblots showing

19 expression of CD63, TSG101, Actinin-4 and Annexin A1 in plasma

20 microvesicles derived from six patients; (D) Representative immunoblots

21 showing expression of Actinin-4 and Annexin A1 in plasma microvesicles

22 and exosomes derived from five patients.

23

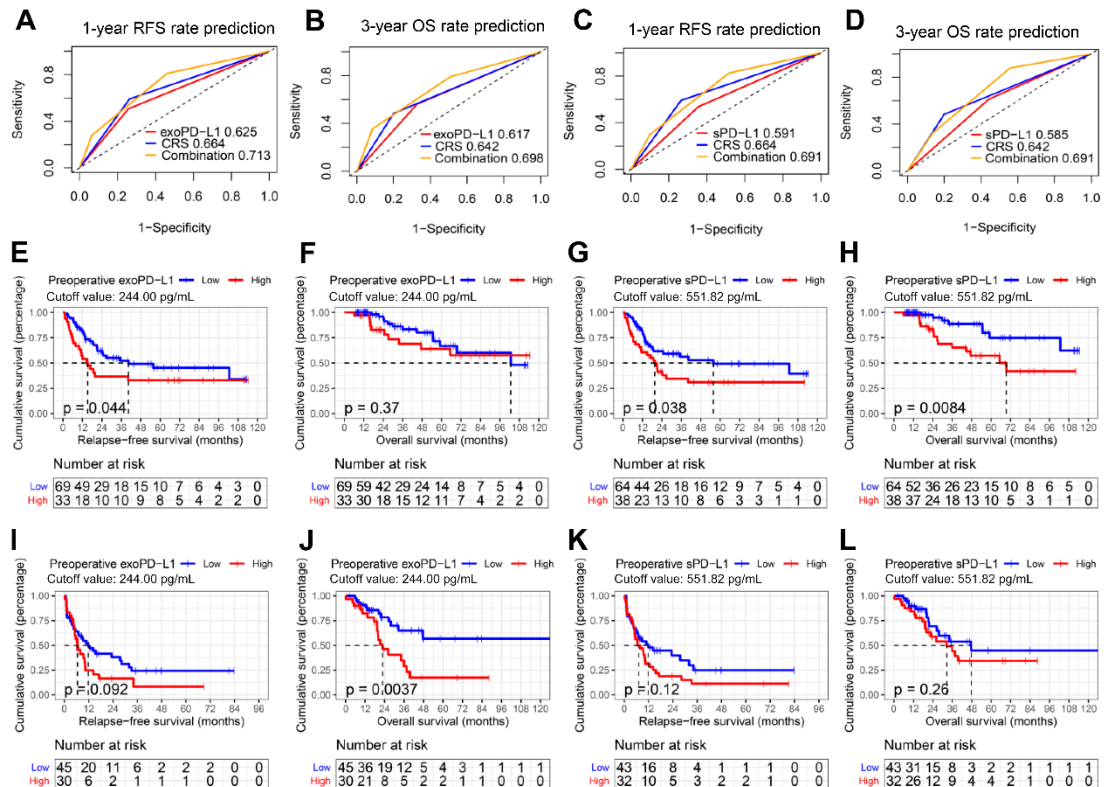

24

25 **Supplementary Fig. 3.** Preoperative exoPD-L1 and sPD-L1 improve  
 26 survival prediction when combine with CRS and can predict the prognosis  
 27 of patients with same CRS (0-2). ROC curve analysis of preoperative  
 28 exoPD-L1 or CRS or combination group at (A) 1-year RFS rate prediction  
 29 and (B) 3-year OS rate prediction; ROC curve analysis of preoperative  
 30 sPD-L1 or CRS or combination group at (C) 1-year RFS rate prediction  
 31 and (D) 3-year OS rate prediction; Kaplan–Meier estimates of (E) relapse-  
 32 free survival (p=0.044) and (F) overall survival (p=0.37) in patients  
 33 according to preoperative exoPD-L1 in patients with low CRS (0-2);  
 34 Kaplan–Meier estimation of (G) relapse-free survival (p=0.038) and (H)  
 35 overall survival (p=0.0084) in patients according to preoperative sPD-L1  
 36 in patients with low CRS (0-2); Kaplan–Meier estimates of (I) relapse-free

37 survival ( $p=0.092$ ) and (J) overall survival ( $p=0.0037$ ) in patients  
38 according to preoperative exoPD-L1 in patients with high CRS (3-5);  
39 Kaplan–Meier estimation of (K) relapse-free survival ( $p=0.12$ ) and (L)  
40 overall survival ( $p=0.26$ ) in patients according to preoperative sPD-L1 in  
41 patients with high CRS (3-5).

42

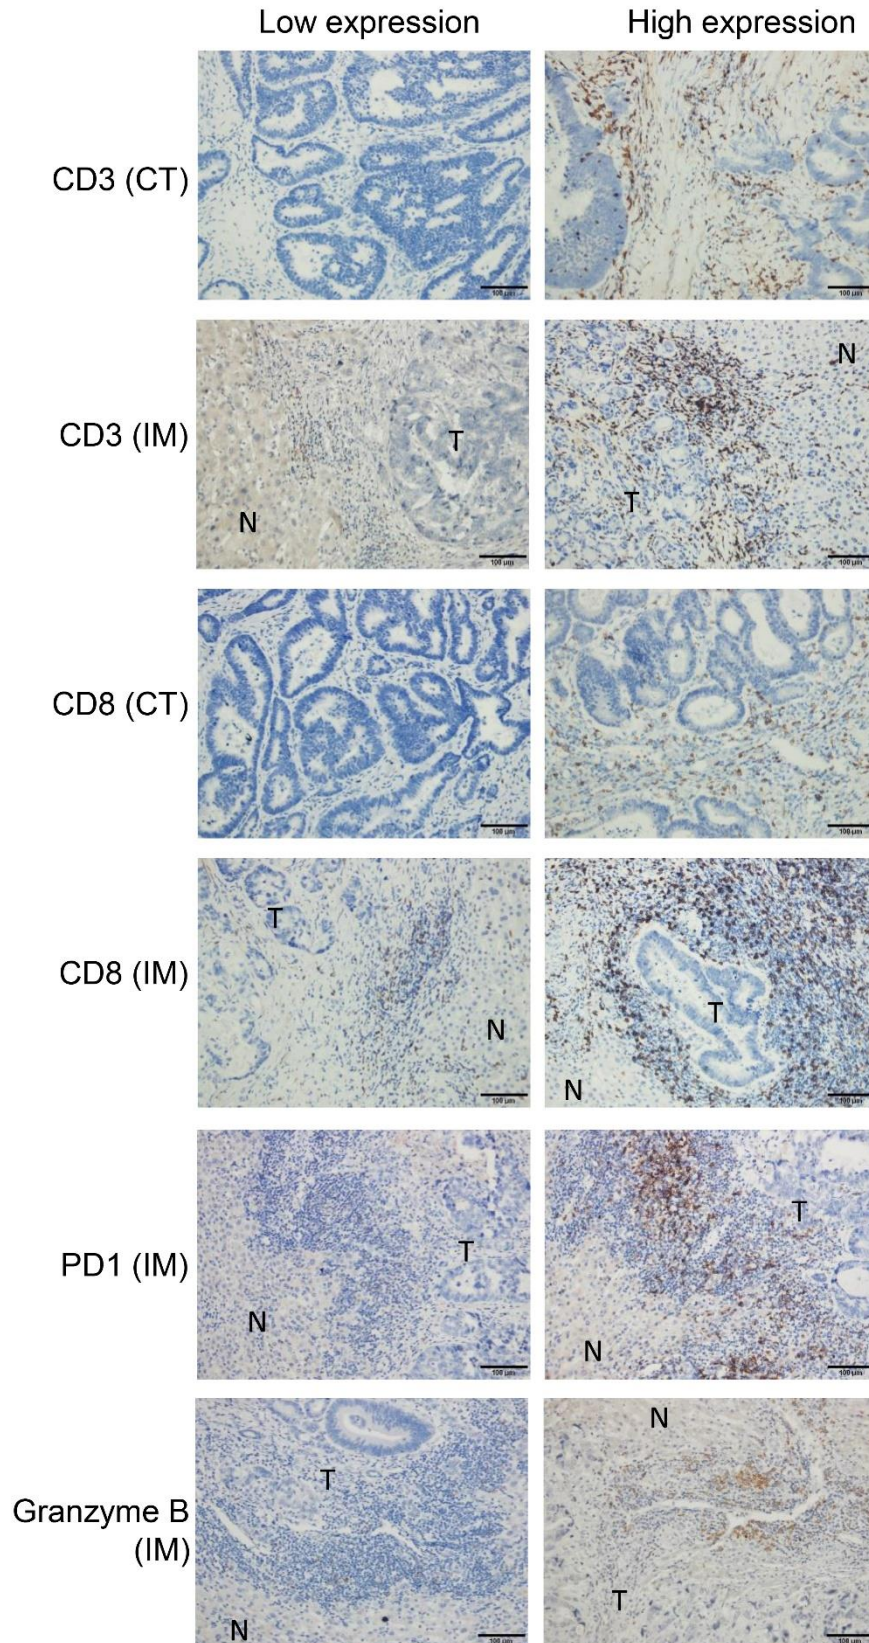

43

44 **Supplementary Fig. 4.** Immunohistochemical detection of CD3, CD8,

45 PD1 and granzyme B expression at the tumor center (CT) and/or the



46 invasive margin (IM). Scale bars indicated 100  $\mu\text{m}$ .

47

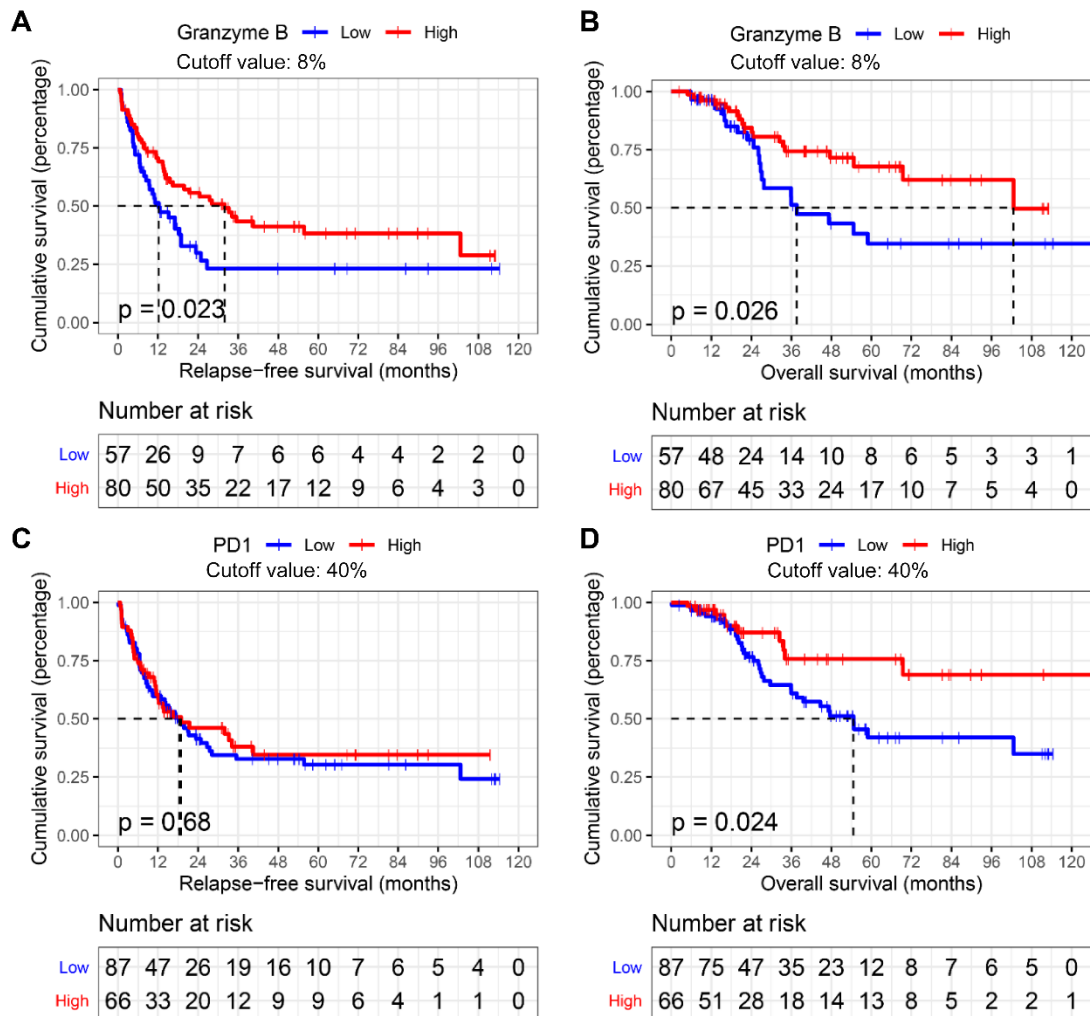

48

49 **Supplementary Fig. 5.** Both GB and PD1 expression at the invasive  
50 margin of colorectal liver metastases can be used as biomarkers of survival.

51 Kaplan–Meier estimates of (A) relapse-free survival ( $p=0.023$ ) and (B)  
52 overall survival ( $p=0.026$ ) in patients according to GB expression at the

53 invasive margin in colorectal liver metastasis; Kaplan–Meier estimates of

54 (C) relapse-free survival ( $p=0.68$ ) and (D) overall survival ( $p=0.024$ ) in

55 patients according to PD1 according to the expression of PD1 at the

56 invasive margin of colorectal liver metastases.

57

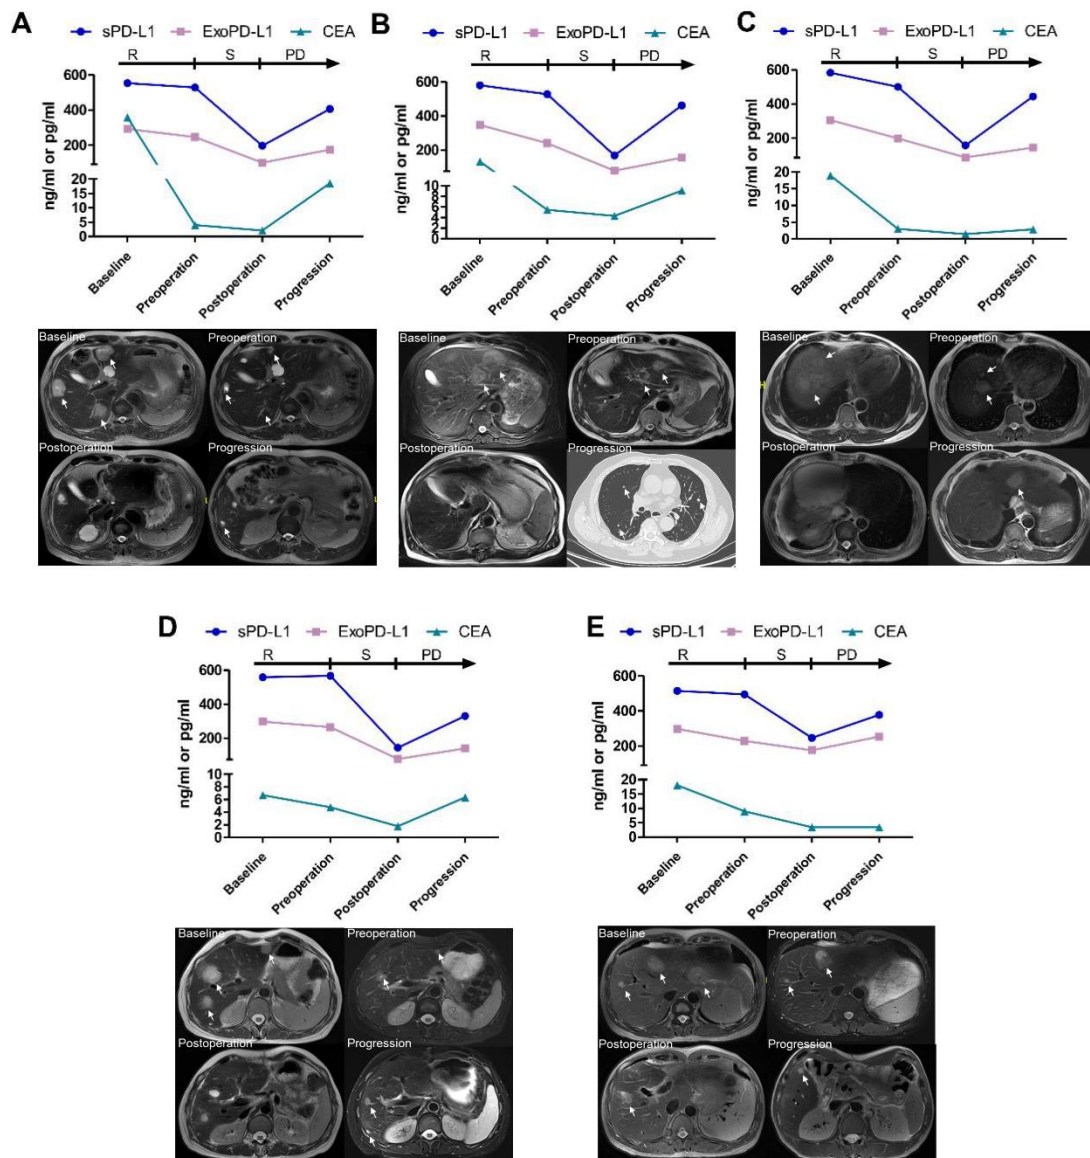

58

59 **Supplementary Fig. 6.** ExoPD-L1 can be used as follow-up markers in

60 CRLM patients. (A-C) Concomitant imaging and circulating PD-L1

61 sampling as well as CEA results in three patients experiencing response

62 after preoperative chemotherapy, but disease progression (> 6 months)

63 after postoperative chemotherapy as observed in liver metastasis on MRI

64 or CT scan; (D-E) Concomitant imaging and circulating PD-L1 sampling

65 as well as CEA in two patients experiencing response after preoperative  
66 chemotherapy, but early recurrence after postoperative chemotherapy as  
67 observed in liver metastasis on MRI or CT scan. Tumor metastases in the  
68 scans are indicated by arrows. R: Response to preoperative chemotherapy;  
69 S: surgery of hepatectomy; PD: progression of disease.
